# Supplementary material for: Stenting for symptomatic intracranial arterial stenosis in China: 1-year outcome of a multicentre registry study
Source: PubMed Central journal article supplement — Stroke Vasc Neurol. 2018 May 7;3(3):176–84. doi: 10.1136/svn-2017-000137 (PMC6169608; doi:10.1136/svn-2017-000137), 2018-05-07
Supplement: svn-2017-000137supp001.pdf [file svn-2017-000137supp001.pdf]

Supplement table 1. Baseline characteristics of patients receiving endovascular treatment.

| Characteristic                                                                                   | Patients (n=300) |
|--------------------------------------------------------------------------------------------------|------------------|
| <b>Age, y, mean (SD)</b>                                                                         | 58.3 (9.78)      |
| <b>Male sex</b>                                                                                  | 228 (76.0%)      |
| <b>Risk factors</b>                                                                              |                  |
| Hypertension                                                                                     | 215 (71.7%)      |
| Hyperlipidemia                                                                                   | 121 (41.3%)      |
| Diabetes mellitus                                                                                | 90 (30.0%)       |
| Smoking history                                                                                  |                  |
| Current                                                                                          | 78 (26.0%)       |
| Former                                                                                           | 88 (29.3%)       |
| Never                                                                                            | 134 (44.7%)      |
| Obesity                                                                                          | 23 (7.7%)        |
| <b>BMI, mean (SD)</b>                                                                            | 25.6 (3.02)      |
| <b>Blood pressure, mm Hg, mean (SD)</b>                                                          |                  |
| Systolic                                                                                         | 138.9 (17.42)    |
| Diastolic                                                                                        | 83.4 (12.10)     |
| <b>Cholesterol, mg/dL, mean (SD)</b>                                                             |                  |
| Low-density lipoprotein                                                                          | 89.2 (36.42)     |
| High-density lipoprotein*                                                                        | 39.7 (10.66)     |
| <b>Qualifying ischemic events</b>                                                                |                  |
| TIA                                                                                              | 137 (45.7%)      |
| Stroke                                                                                           | 163 (54.3%)      |
| <b>Symptomatic qualifying artery</b>                                                             |                  |
| BA                                                                                               | 94 (31.3%)       |
| Intracranial vertebral                                                                           | 73 (24.3%)       |
| MCA                                                                                              | 91 (30.3%)       |
| Intracranial carotid                                                                             | 42 (14.0%)       |
| <b>Imaging modalities for evaluation of hemodynamic impairment before endovascular treatment</b> |                  |
| Perfusion CT                                                                                     | 156 (52.0%)      |

|                                                                   |             |
|-------------------------------------------------------------------|-------------|
| DSA                                                               | 122 (40.6%) |
| MRI                                                               | 22 (7.3%)   |
| <b>Time from qualifying event to endovascular treatment, days</b> |             |
| Median                                                            | 21          |
| Interquartile range                                               | 10-34       |
| <b>Cases with loading dose of clopidogrel</b>                     | 26 (8.7%)   |
| <b>Arterial stenosis, %, mean (SD)</b>                            | 84.3 (7.51) |

BMI denotes body mass index; TIA denotes transient ischemic attack; BA denotes basilar artery; MCA denotes middle cerebral artery; CT denotes computer tomography; DSA denotes digital subtraction angiogram; MRI denotes magnetic resonance imaging. \*The data came from 295 patients with available high-density lipoprotein.

Supplement table 2. Comparison baseline characteristics between patients balloon mounted stenting and balloon predilation plus self-expanding stenting

| Characteristic                          | Patients treated with balloon mounted stenting (n=159) | Patients treated with balloon predilation plus self-expanding stenting (n=141) | <i>P</i> Value |
|-----------------------------------------|--------------------------------------------------------|--------------------------------------------------------------------------------|----------------|
| <b>Age, y, mean (SD)</b>                | 59.4 (9.51)                                            | 57.0 (9.95)                                                                    | 0.034          |
| <b>Male sex</b>                         | 120 (75.5%)                                            | 108 (76.6%)                                                                    | 0.892          |
| <b>Risk factors</b>                     |                                                        |                                                                                |                |
| Hypertension                            | 110 (69.2%)                                            | 105 (74.5%)                                                                    | 0.369          |
| Hyperlipidemia                          | 60 (37.7%)                                             | 61 (43.3%)                                                                     | 0.347          |
| Diabetes mellitus                       | 53 (33.3%)                                             | 37 (26.2%)                                                                     | 0.207          |
| Smoking history                         |                                                        |                                                                                |                |
| Current                                 | 43 (27.0%)                                             | 35 (24.8%)                                                                     | 0.694          |
| Former                                  | 45 (28.3%)                                             | 43 (30.5%)                                                                     | 0.704          |
| Never                                   | 71 (44.7%)                                             | 63 (44.7%)                                                                     | 1.000          |
| Obesity                                 | 15 (9.4%)                                              | 8 (5.7%)                                                                       | 0.279          |
| <b>BMI, mean (SD)</b>                   | 25.7 (3.14)                                            | 25.5 (2.88)                                                                    | 0.669          |
| <b>Blood pressure, mm Hg, mean (SD)</b> |                                                        |                                                                                |                |
| Systolic                                | 137.1 (15.80)                                          | 141.0 (18.92)                                                                  | 0.056          |
| Diastolic                               | 83.2 (13.53)                                           | 83.6 (10.30)                                                                   | 0.805          |
| <b>Cholesterol, mg/dL, mean (SD)</b>    |                                                        |                                                                                |                |
| Low-density lipoprotein                 | 86.3 (37.28)                                           | 92.5 (35.27)                                                                   | 0.141          |
| High-density lipoprotein*               | 39.4 (11.37)                                           | 40.1 (9.58)                                                                    | 0.540          |
| <b>Qualifying ischemic events</b>       |                                                        |                                                                                |                |
| TIA                                     | 75 (47.2%)                                             | 62 (44.0%)                                                                     | 0.643          |
| Stroke                                  | 84 (52.8%)                                             | 79 (56.0%)                                                                     | 0.643          |
| <b>Symptomatic qualifying artery</b>    |                                                        |                                                                                |                |
| BA                                      | 48 (30.2%)                                             | 46 (32.6%)                                                                     | 0.709          |
| Intracranial vertebral                  | 48 (30.2%)                                             | 25 (17.7%)                                                                     | 0.015          |

|                                                                   |             |             |       |
|-------------------------------------------------------------------|-------------|-------------|-------|
| MCA                                                               | 38 (23.9%)  | 53 (37.6%)  | 0.012 |
| Intracranial carotid                                              | 25 (15.7%)  | 17 (12.1%)  | 0.407 |
| <b>Time from qualifying event to endovascular treatment, days</b> |             |             |       |
| Median                                                            | 20          | 22          |       |
| Interquartile range                                               | 9-34        | 11-33       | 0.763 |
| <b>Cases with loading dose of clopidogrel</b>                     | 18 (11.3%)  | 8 (5.7%)    | 0.101 |
| <b>Arterial stenosis,%, mean (SD)</b>                             | 84.0 (7.35) | 84.7 (7.69) | 0.436 |
| <b>Mori type</b>                                                  |             |             |       |
| Mori A                                                            | 53 (33.3%)  | 27 (19.1%)  | 0.006 |
| Mori B                                                            | 83 (52.2%)  | 80 (56.7%)  | 0.486 |
| Mori C                                                            | 23 (14.5%)  | 34 (24.1%)  | 0.039 |
| <b>Anesthesia</b>                                                 |             |             |       |
| Local anesthesia                                                  | 52 (32.7%)  | 48 (34.0%)  | 0.808 |
| General anesthesia                                                | 107 (67.3%) | 93 (66.0%)  | 0.808 |

BMI denotes body mass index; TIA denotes transient ischemic attack; BA denotes basilar artery; MCA denotes middle cerebral artery.\*The data came from 295 patients with available high-density lipoprotein.

Supplement table 3. Comparison of baseline characteristics between patients with and without primary outcome.

| Characteristic                                                             | Patients treated without composite primary endpoints (n=275) | Patients treated with composite primary endpoints (n=25) | Unadjusted HR | 95% CI       | P Value |
|----------------------------------------------------------------------------|--------------------------------------------------------------|----------------------------------------------------------|---------------|--------------|---------|
| <b>Age, y, mean (SD)</b>                                                   | 58.1 (9.81)                                                  | 61.0 (9.19)                                              | 1.032         | 0.989-1.076  | 0.150   |
| <b>Male sex</b>                                                            | 208 (75.6%)                                                  | 20 (80.0%)                                               | 0.790         | 0.296-2.104  | 0.636   |
| <b>Risk factors</b>                                                        |                                                              |                                                          |               |              |         |
| Hypertension                                                               | 199 (72.7%)                                                  | 16 (64.0%)                                               | 0.698         | 0.308-1.579  | 0.388   |
| Hyperlipidemia                                                             | 113 (41.1%)                                                  | 8 (32.0%)                                                | 0.688         | 0.297-1.593  | 0.382   |
| Diabetes mellitus                                                          | 86 (31.3%)                                                   | 4 (16.0%)                                                | 0.436         | 0.150-1.269  | 0.128   |
| <b>Smoking history</b>                                                     |                                                              |                                                          |               |              |         |
| Current                                                                    | 72 (26.2%)                                                   | 6 (24.0%)                                                | 0.887         | 0.354-2.220  | 0.797   |
| Former                                                                     | 81 (29.5%)                                                   | 7 (28.0%)                                                | 0.943         | 0.394-2.257  | 0.895   |
| Never                                                                      | 122 (44.4%)                                                  | 12 (48.0%)                                               | 0.870         | 0.397-1.906  | 0.727   |
| Obesity                                                                    | 23 (8.4%)                                                    | 0 (0%)                                                   | 0.044         | 0.000-25.638 | 0.336   |
| <b>BMI, mean (SD)</b>                                                      | 25.6 (3.03)                                                  | 25.3(2.94)                                               | 0.963         | 0.846-1.096  | 0.570   |
| <b>Blood pressure, mm Hg, mean (SD)</b>                                    |                                                              |                                                          |               |              |         |
| Systolic                                                                   | 138.7 (17.32)                                                | 140.6 (18.75)                                            | 1.005         | 0.983-1.027  | 0.649   |
| Diastolic                                                                  | 83.4 (12.22)                                                 | 83.0 (10.91)                                             | 0.997         | 0.965-1.031  | 0.876   |
| <b>Cholesterol, mg/dL, mean (SD)</b>                                       |                                                              |                                                          |               |              |         |
| Low-density lipoprotein                                                    | 89.4(35.89)                                                  | 87.1(42.64)                                              | 0.998         | 0.987-1.010  | 0.791   |
| High-density lipoprotein*                                                  | 39.9(10.71)                                                  | 37.6(10.01)                                              | 0.979         | 0.940-1.020  | 0.310   |
| <b>Qualifying ischemic events (Stroke )</b>                                | 150 (54.5%)                                                  | 13 (52.0%)                                               | 0.905         | 0.413-1.984  | 0.804   |
| <b>Symptomatic qualifying artery</b>                                       |                                                              |                                                          |               |              |         |
| BA                                                                         | 85 (30.9%)                                                   | 9 (36.0%)                                                | 1.259         | 0.556-2.849  | 0.580   |
| Intracranial vertebral                                                     | 69 (25.1%)                                                   | 4 (16.0%)                                                | 0.574         | 0.197-1.673  | 0.309   |
| MCA                                                                        | 82 (29.8%)                                                   | 9 (36.0%)                                                | 1.302         | 0.575-2.946  | 0.527   |
| Intracranial carotid                                                       | 39 (14.2%)                                                   | 3 (12.0%)                                                | 0.835         | 0.250-2.790  | 0.770   |
| <b>Time from qualifying event to endovascular treatment, days , median</b> | 21(10.0-34.0)                                                | 18 ( 8.0-30.5 )                                          | 0.999         | 0.969-1.010  | 0.315   |

|                                               | <b>(Interquartile range)</b> |            |       |             |       |
|-----------------------------------------------|------------------------------|------------|-------|-------------|-------|
| <b>Cases with loading dose of clopidogrel</b> | 24 (8.7%)                    | 2 (8.0%)   | 0.897 | 0.211-3.803 | 0.882 |
| <b>Arterial stenosis, %, mean (SD)</b>        | 84.4(7.58)                   | 84.0(6.81) | 0.993 | 0.942-1.046 | 0.778 |
| <b>Mori type</b>                              |                              |            |       |             |       |
| Mori A                                        | 75 (27.3%)                   | 5 (20.0%)  | 0.692 | 0.260-1.844 | 0.462 |
| Mori B                                        | 149 (54.2%)                  | 14 (56.0%) | 1.059 | 0.481-2.333 | 0.886 |
| Mori C                                        | 51 (18.5%)                   | 6 (24.0%)  | 1.356 | 0.542-3.395 | 0.516 |
| <b>General anesthesia</b>                     | 180 (65.5%)                  | 20 (80.0%) | 2.036 | 0.764-5.425 | 0.155 |
| <b>Residual stenosis, %, mean (SD)</b>        | 8.6 (8.10)                   | 8.0 (8.41) | 0.991 | 0.943-1.042 | 0.736 |
| <b>Balloon mounted stent</b>                  | 145 (52.7%)                  | 14 (56.0%) | 0.893 | 0.405-1.967 | 0.779 |

BMI denotes body mass index; TIA denotes transient ischemic attack; BA denotes basilar artery; MCA denotes middle cerebral artery.\*The data came from 295 patients with available high-density lipoprotein.
