# Supplementary material for: Stenting for symptomatic intracranial arterial stenosis in China: 1-year outcome of a multicentre registry study
Source: PubMed Central journal article supplement — Stroke Vasc Neurol. 2018 May 7;3(3):176–84. doi: 10.1136/svn-2017-000137 (PMC6169608; doi:10.1136/svn-2017-000137), 2018-05-07
Supplement: svn-2017-000137supp002.pdf [file svn-2017-000137supp002.pdf]

## **The list of Study Group of Registry Study of Stenting for Symptomatic**

### **Intracranial Artery Stenosis in China:**

Ligang Song, MD (Department of Interventional Neuroradiology, Acquisition of clinical data ); Xuan Sun, MD (Department of Interventional Neuroradiology, Acquisition of clinical data); Lian Liu, MD (Department of Interventional Neuroradiology, Acquisition of clinical data); Xiaotong Xu, MD (Department of Interventional Neuroradiology, Acquisition of clinical data); Xiaoqing Li, MD (Department of Interventional Neuroradiology, Acquisition of clinical data); Xiaochuan Huo, MD (Department of Interventional Neuroradiology, Acquisition of clinical data); Xuelei Zhang, MD (Department of Interventional Neuroradiology, Acquisition of follow-up data); Baixue Jia, MD (Department of Interventional Neuroradiology, Acquisition of follow-up data); Peiyi Gao, MD (Department of Radiology, Acquisition of imaging data); Jiong Zhan, MD (Department of Radiology, Acquisition of imaging data); Shaowu Li, MD (Department of Radiology, Acquisition of imaging data), Beijing ,Tiantan Hospital, Capital Medical University, China National Clinical Research Center for Neurological Diseases, Center of Stroke, Beijing Institute for Brain Disorders, Beijing, China.

Xianjun Zhang, MD (Department of Neurology, Acquisition of clinical data); Xin Li, MD (Department of Neurology, Acquisition of clinical data); Xiaojun Ji, MD (Department of Neurology, Acquisition of follow-up data), The Affiliated Hospital of Qingdao University Medical College, Qingdao, China.

Zili Gong, MD (Department of Neurology, Acquisition of clinical data); Saining

Cheng, MD (Department of Neurology, Acquisition of clinical data); Lin Shen, MD (Department of Neurology, Acquisition of follow-up data), Xin Qiao Hospital, Third Military Medical University, Chongqing, China.

Wei Wang, MD (Department of Neurology, Acquisition of clinical data); Tianyou Zhang, MD (Department of Neurology, Acquisition of follow-up data), Baotou Central Hospital, Baotou, China.

Xianjun Wang, MD (Department of Neurology, Acquisition of clinical data); Jian Gong, MD (Department of Neurology, Acquisition of clinical data); Hongxin Han, MD (Department of Neurology, Acquisition of follow-up data), Linyi People's Hospital, Linyi, China.

Shugui Shi, MD (Department of Neurology, Acquisition of clinical data); Zhenhua, Zhou, MD (Department of Neurology, Acquisition of follow-up data), Xi Nan Hospital, Third Military Medical University, Chongqing, China.

Yi An, MD (Department of Neurology, Acquisition of clinical data); Zhijun Dong, MD (Department of Neurology, Acquisition of clinical data); Xiaomei Gao, MD (Department of Neurology, Acquisition of follow-up data), The Hospital of Chifeng City, Chifeng, China.

Jun Wang, MD (Department of Neurosurgery, Acquisition of clinical data); Xiangyu, Cao, MD (Department of Neurosurgery, Acquisition of follow-up data), The PLA General Hospital, Beijing, China.

Guozhen Zhang, MD (Department of Neurology, Acquisition of clinical data); Shaoju Shao, MD (Department of Neurology, Acquisition of follow-up data), The Lanzhou

General Hospital of PLA, Lanzhou, China.

Honghua Gao, MD (Department of Neurology, Acquisition of clinical data), The Affiliated Fourth Hospital of China Medical University, Shenyang, China;

Xiongjun He, MD (Department of Neurology, Acquisition of clinical data); Kaifeng Li, MD (Department of Neurology, Acquisition of clinical data); Liang Zhang, MD (Department of Neurology, Acquisition of follow-up data), Zhujiang Hospital, Southern Medical University, Guangzhou, China.

Yongsheng Liu, MD (Department of Neurology, Acquisition of clinical data); Ke Li, MD (Department of Neurology, Acquisition of follow-up data), The First Affiliated Hospital of Dalian Medical University, Dalian, China.

Ruiyan Li, MD (Department of Neurosurgery, Acquisition of clinical data); Zhongfei Song, MD (Department of Neurosurgery, Acquisition of follow-up data), The Second Affiliated Hospital of Harbin Medical University, Harbin, China.

Hongbo Han, MD (Department of Interventional Radiology, Acquisition of clinical data); Zhaowei Song, MD (Department of Interventional Radiology, Acquisition of follow-up data), Cangzhou Central Hospital, Cangzhou, China.

Fayun Hu, MD (Department of Neurology, Acquisition of clinical data), West China Hospital, Sichuan University, Chengdu, China.
